# Supplementary material for: High Seroprevalence against SARS-CoV-2 among Dogs and Cats, Poland, 2021/2022
Source: MDPI journal article supplement (doi:10.3390/ani12162016), 2022-08-09
Supplement: s1 [file s1]

## Supplementary Materials

# High Seroprevalence against SARS-CoV-2 among Dogs and Cats, Poland, 2021/2022

**Supplementary Table S1.** Detailed data obtained about dogs positive for SARS-CoV-2 antibodies (n= 10) from two clinics in Olsztyn. IFA – indirect immunofluorescence assay, M – male, F – female.

| Numer of dog | Clinic | Gender | Age (years) | Reason for visit of veterinarian                                 | Owner's SARS-CoV-2 health status                                                 | Additional information                                                                                                                                                                                                                                                                                                                                                                                                                                            | RBD-ELISA (corr. OD) | iIFA (titer) |
|--------------|--------|--------|-------------|------------------------------------------------------------------|----------------------------------------------------------------------------------|-------------------------------------------------------------------------------------------------------------------------------------------------------------------------------------------------------------------------------------------------------------------------------------------------------------------------------------------------------------------------------------------------------------------------------------------------------------------|----------------------|--------------|
| 1            | 2      | M      | 9           | babesiosis suspected                                             | unknown                                                                          | none                                                                                                                                                                                                                                                                                                                                                                                                                                                              | 0.55                 | 1/8          |
| 2            | 2      | M      | 2           | blood test prior to ophthalmic surgery - clinically healthy dog  | unknown                                                                          | none                                                                                                                                                                                                                                                                                                                                                                                                                                                              | 1.21                 | 1/32         |
| 3            | 2      | M      | 2           | routine blood test before neutering surgery - clinically healthy | unknown                                                                          | none                                                                                                                                                                                                                                                                                                                                                                                                                                                              | 1.597                | >1/64        |
| 4            | 2      | F      | 4           | bone choking, shallow breathing                                  | became infected a month later with SARS-CoV-2, variant unknown                   | none                                                                                                                                                                                                                                                                                                                                                                                                                                                              | 0.239                | 1/32         |
| 5            | 2      | M      | 2           | routine blood test before extraction of a tooth                  | unknown                                                                          | none                                                                                                                                                                                                                                                                                                                                                                                                                                                              | 0.366                | 1/32         |
| 6            | 1      | F      | 10          | persistent cough                                                 | owner SARS-CoV-2 confirmed 4-5 weeks before sampling of the dog, variant unknown | serous discharge from the nose and eyes, sneezing, coughing at the time of sampling, clinical signs persisted from December to February 2021, no lung changes on the X-ray, cardiac examination revealed a small mitral valve regurgitation, cough did not respond to antibiotic treatment, gradual improvement after nebulisations, then the clinical signs stopped.<br>At the same time a cat from this household sneezed, but blood samples are not available. | 0.252                | 1/16         |

|    |   |   |   |                     |                                 |       |       |
|----|---|---|---|---------------------|---------------------------------|-------|-------|
| 7  | 1 | F | 5 | routine blood tests | none                            | 0.537 | 1/16  |
| 8  | 1 | F | 7 | routine blood tests | none                            | 0.229 | 1/16  |
| 9  | 1 | M | 6 | abdominal pain      | abdominal pain, and anxiousness | 0.671 | >1/64 |
| 10 | 1 | F | 2 | routine blood tests | none                            | 0.674 | >1/64 |

**Supplementary Table S2.** Detailed data obtained about cats positive for SARS-CoV-2 antibodies (n= 9) from two clinics in Olsztyn., M – male, F – female.

| Number of cat | Clinic | Gender | Age (years) | Reason for visit of veterinarian           | Owner's SARS-CoV-2 health status                                        | Additional information                                                                                                            | RBD-ELISA (corr. OD) | iIFA (titer) |
|---------------|--------|--------|-------------|--------------------------------------------|-------------------------------------------------------------------------|-----------------------------------------------------------------------------------------------------------------------------------|----------------------|--------------|
| 1             | 1      | F      | 5           | routine blood tests                        | unknown                                                                 | none                                                                                                                              | 1.058                | >1/64        |
| 2             | 1      | F      | 9           | routine blood tests                        | unknown                                                                 | none                                                                                                                              | 1.581                | >1/64        |
| 3             | 1      | M      | 6           | owners concerned about the cat's behaviour | owner SARS-CoV-2 confirmed three weeks before sampling, variant unknown | fever, sneezing, lethargy observed by the owner during its own illness (clinical signs have begun 3 days after owner's diagnosis) | 1.055                | >1/64        |
| 4             | 1      | M      | 4           | owners concerned about the cat's behaviour | unknown                                                                 | lack of appetite, fever, lethargy                                                                                                 | 0.896                | >1/64        |
| 5             | 1      | M      | 8           | routine blood test                         | unknown                                                                 | none                                                                                                                              | 0.355                | 1/32         |
| 6             | 1      | M      | 11          | routine blood test                         | unknown                                                                 | none                                                                                                                              | 0.954                | >1/64        |
| 7             | 1      | M      | 7           | routine blood tests                        | unknown                                                                 | none                                                                                                                              | 0.249                | 1/16         |
| 8             | 1      | F      | 10          | routine blood tests                        | unknown                                                                 | none                                                                                                                              | 1.535                | >1/64        |
| 9             | 1      | M      | 15          | routine blood tests                        | unknown                                                                 | none                                                                                                                              | 0.449                | >1/64        |
